# Supplementary material for: Quantitative single-molecule study reveals site-specific photo-oxidation activities and kinetics on 2D g-C3N4
Source: Royal Society of Chemistry journal article supplement (doi:10.1039/d3cc00750b), 2023-01-01
Supplement: d3cc00750b1.pdf [file d3cc00750b1.pdf]

# Supporting Information

## Quantitative single-molecule study reveals site-specific photo-oxidation activities and kinetics on

### 2D g-C<sub>3</sub>N<sub>4</sub>

*Shuyang Wu,<sup>†</sup> Jenica Marie L. Madridejos,<sup>†</sup> Jinn-Kye Lee, Rong Xu, Yunpeng Lu,\* Zhengyang Zhang\**

School of Chemistry, Chemical Engineering and Biotechnology, Nanyang Technological University, 21 Nanyang Link, Singapore 637371.

Corresponding Author

E-mail: [yplu@ntu.edu.sg](mailto:yplu@ntu.edu.sg)

E-mail: [zhang.zy@ntu.edu.sg](mailto:zhang.zy@ntu.edu.sg)

<sup>†</sup>These authors contributed equally.

## 17 **Section 1. Experimental section**

### 18 **Synthesis of the photocatalysts**

19 The g-C<sub>3</sub>N<sub>4</sub> was prepared through thermal polymerization of melamine followed by subsequent  
20 thermal exfoliation in air.<sup>1</sup> In a typical preparation, 5 g of melamine was put into a covered crucible  
21 and then heated to 500 °C for 2 h with a rate of 2 °C min<sup>-1</sup>. Next, the calcination temperature was  
22 increased to 520 °C and maintained for 2 h. The yellow product was ground and 1 g of the product  
23 was put in an ark. The powder was evenly spread to a thin layer and put in the muffle furnace.  
24 Then it was heated to 520 °C with a ramping rate of 2 °C min<sup>-1</sup> and maintained for 6 h. The obtained  
25 white product was named as CNS.

### 26 **Materials characterization**

27 Transmission electron microscopy (TEM) was conducted on JEOL JEM-2100Plus microscope.  
28 Atomic-force microscopy (AFM) images were obtained on Bruker Dimension XR Icon AFM. The  
29 X-ray diffraction (XRD) pattern was acquired on Bruker D2 Phaser diffractometer with Cu K $\alpha$   
30 irradiation ( $\lambda=1.54184$  Å) at 10 mA and 30 kV as the incident beam. Fourier transform infrared  
31 (FTIR) spectroscopy was carried out on Perkin-Elmer spectrophotometer (Spectrum 100).  
32 Ultraviolet photoelectron spectroscopy (UPS) was conducted on Shimadzu Kratos Axis Supra  
33 spectrometer equipped with He-I photon source (21.21 eV). UV-vis diffuse reflection spectra  
34 (DRS) were collected on the Shimadzu UV-2450 spectrophotometer.

### 35 **Single-molecule fluorescence imaging**

36 The SMF imaging was performed on a total internal reflection fluorescence (TIRF) microscope  
37 (Nikon Eclipse Ti-U). In a typical preparation of sample-deposited coverslip, a few drops of  
38 catalyst ink (1 mg mL<sup>-1</sup>) were deposited on the coverslip and fully dried in the oven. Then, a  
39 microflow chamber (75.5 mm  $\times$  25.5 mm  $\times$  0.6 mm) was attached to the coverslip and sealed

40 tightly, which was transferred and fixed on the microscope stage. The Amplex<sup>®</sup> red (AR) solution  
41 was bubbled with N<sub>2</sub> gas for 30 min to remove O<sub>2</sub> in the solution before introduced to the reaction  
42 chamber. Different concentrations of AR (0.02, 0.05, 0.1, 0.2, 0.5 and 1 μM) solutions were  
43 pumped to the chamber with a flowrate of 20 μL min<sup>-1</sup>. The brightfield images were collected  
44 before illumination. The photocatalyst and resorufin were excited by a circularly polarized 405 nm  
45 laser (5 mW, L6CC Oxxius) and a 532 nm laser (20 mW), respectively through a quad-edge laser  
46 dichroic mirror (Di03-R405/488/532/635-t1-25x36, Semrock). The photoluminescence (PL)  
47 signal passed through oil-immersion objective lens (Nikon Plan Apo λ 100×, NA 1.45) and a band-  
48 pass filter (ET605/70m, Chroma) to reduce the photocatalyst PL signal. Then, the signal was  
49 collected by a high-speed electron multiplying charge coupled device (EMCCD) camera (Andor  
50 iXon3, 60 Hz). In a typical run, a video composed of more than 30000 frames was recorded and  
51 finally processed by the software.

## 52 **Computational details**

53 To provide further insights into the photocatalytic activities of different g-C<sub>3</sub>N<sub>4</sub> surfaces, DFT  
54 calculations with Vienna Ab-initio Simulation Package (VASP)<sup>2-5</sup> were performed for the  
55 adsorption of AR on BP, wrinkle, and edge. In our calculations, the Perdew-Burke-Ernzerhof  
56 (PBE)<sup>6, 7</sup> functional of the generalized gradient approximation with a plane-wave cut-off energy  
57 of 450 eV was used.<sup>8, 9</sup> The basal plane and wrinkle surfaces were based on previous work on g-  
58 C<sub>3</sub>N<sub>4</sub> while the edge was modelled by terminating the N-atoms with hydrogen and adding 10 Å to  
59 signify the end of the surface. Optimization calculations were performed using energy and force  
60 convergence limits equal to 10<sup>-4</sup> eV per atom and 0.01 eV Å<sup>-1</sup> for different surface slabs with  
61 explicit dispersion corrections using D3 Grimme's method (DFT-D3).<sup>10, 11</sup> Geometric constraints  
62 were applied to both BP and edge g-C<sub>3</sub>N<sub>4</sub> surfaces to prevent their corrugation into the more stable

63 wrinkle structures. The Brillouin zone integration was carried out with a  $3 \times 3 \times 1$  Monkhorst-Pack  
64 grid for the different surface slabs, and the vacuum height was set to 20 Å between different layers.  
65 To optimize AR, the unit cell is set to  $20 \text{ Å} \times 20 \text{ Å} \times 20 \text{ Å}$  to avoid interactions between  
66 neighboring molecules and a  $1 \times 1 \times 1$  Monkhorst-Pack grid. Several initial locations and  
67 configurations of AR on all three surfaces were considered based on symmetry and other important  
68 molecular interactions. All the input geometries were optimized and reported in the Supporting  
69 Information while the most stable structures in energy are presented here. The adsorption energy (  
70  $E_{ads}$ ) was calculated according to **Eqn. S1**

$$71 \quad E_{ads} = -(E_{total} - E_{substrate} - E_{gas-phase adsorbate}) \quad (\text{S1})$$

72 Where  $E_{total}$  is the total energy calculated for the substrate with adsorbed reactant or product,  
73  $E_{substrate}$  is the calculated energy of the clean substrate, and  $E_{gas-phase adsorbate}$  is the calculated  
74 energy of adsorbed gas phase molecule. To elucidate further the interactions between the adsorbate  
75 and substrate, the change of charge densities was quantified using Bader charge analysis.<sup>12-14</sup>

76

## 77 Section S2. Morphology and physicochemical properties of CNS.

78 The phase structure of CNS was characterized by XRD as shown in **Fig. S1a**. The (002) plane  
79 of g-C<sub>3</sub>N<sub>4</sub> is identified by the diffraction peak at 27.5°, which is attributed to the interplanar  
80 periodic stacking of aromatic rings.<sup>15</sup> The low-angle peak at around 13° which is related to the in-  
81 plane packing of tri-s-triazine motifs is absent in our result. This is probably due to the decrease  
82 of planar size during the thermal etching process. FTIR spectra were collected to further verify the  
83 CNS structure (**Fig. S1b**). The broad band between 3000 and 3600 cm<sup>-1</sup> is ascribed to the stretching  
84 mode of N-H bonds. The peaks in the range of 1100 and 1650 cm<sup>-1</sup> correspond to the aromatic  
85 heterocycle stretching.<sup>16</sup> The vibrational bending of triazine rings accounts for the absorption peak  
86 at 808 cm<sup>-1</sup>.<sup>17</sup> The morphology and structural features of CNS are revealed in the TEM images. In  
87 **Fig. S2a**, CNS exhibits an ultrathin and graphene-like structure with great tunability and  
88 flexibility. The thickness is measured to be ~9.5 nm by AFM (**Fig. S3**). The rough surface of CNS  
89 is observed, which is caused by the decomposition of polymeric melon units in the g-C<sub>3</sub>N<sub>4</sub> planar  
90 structure.<sup>18</sup> Besides, the wrinkle structure is formed by folding or bending of BPs (**Fig. S2a,b**),  
91 which reduces the surface energy of CNS. UV-vis DRS and UPS spectra were recorded to study  
92 the optical properties of CNS. In **Fig. S2c**, the bandgap energy of CNS is determined to be 3.0 eV  
93 by the Tauc plot (inset of **Fig. S2c**). The slight enhanced absorption in the visible light region is  
94 probably due to the multiple scattering effect caused by the porous nature of CNS.<sup>19</sup> The valence  
95 band (VB) potential of CNS was determined by UPS. As shown in **Fig. S2d**, the VB maximum is  
96 determined to be 1.85 eV and thus the conduction band (CB) minimum of CNS is calculated to be  
97 -1.15 eV (inset of **Fig. S2d**). The relative positive VB position of CNS provides sufficient  
98 oxidation potential for compound photodegradation, which contributes to the pollutant removal  
99 and environmental purification.

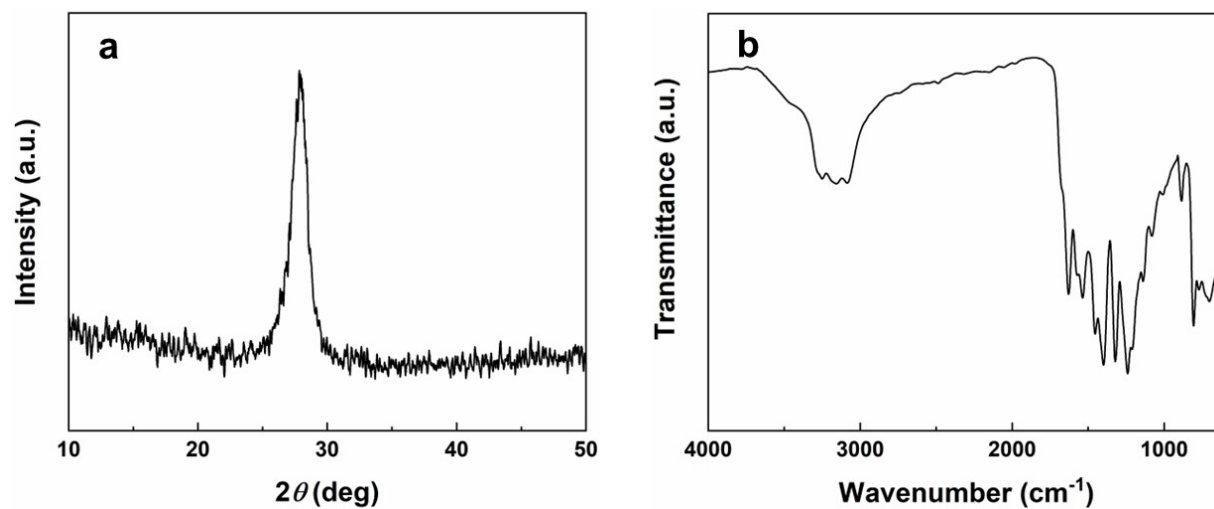

100

101 **Fig. S1** (a) XRD patterns and (b) FTIR spectra of CNS.

102

103

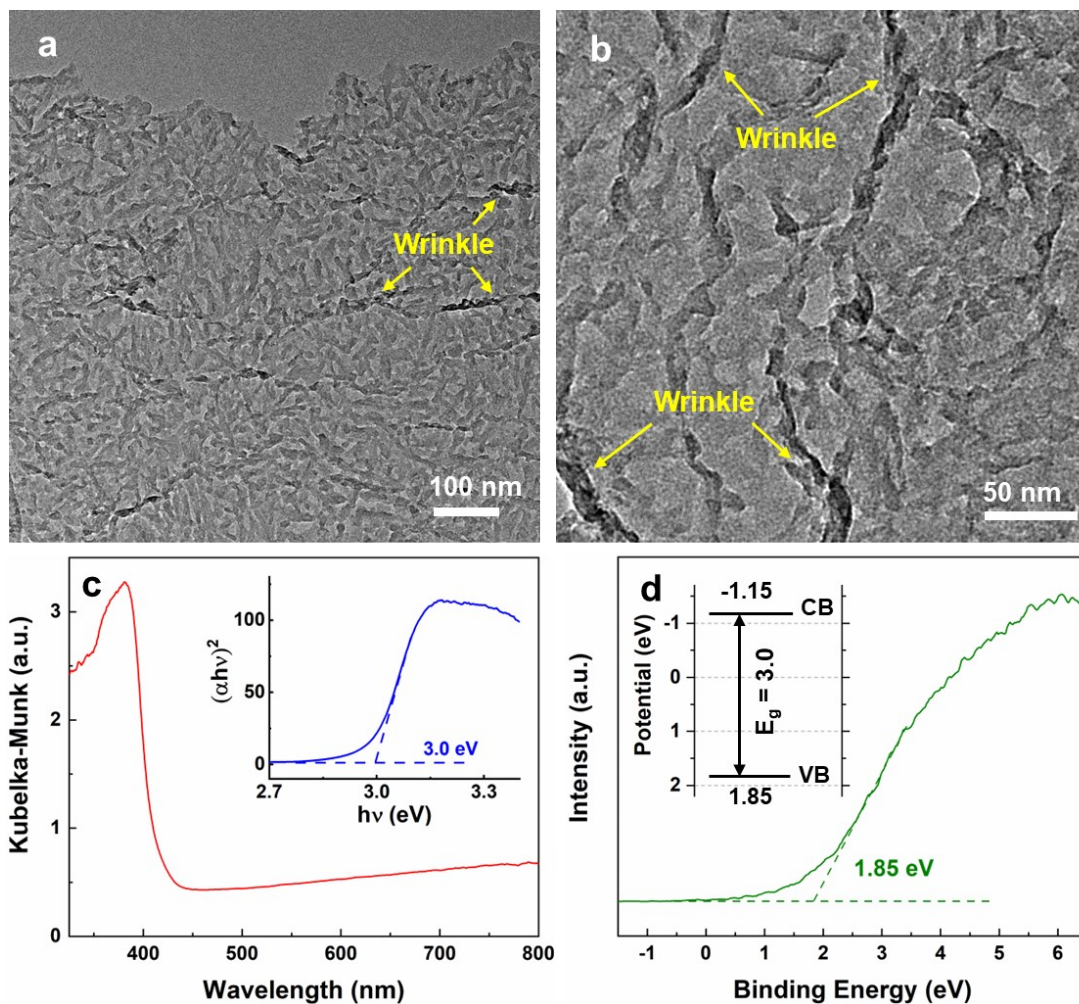

104

105 **Fig. S2** Morphology and optical properties of CNS. (a, b) TEM images, (c) UV-vis DRS spectra  
 106 (inset: Tauc plot) and (d) UPS spectra (inset: energy level diagram for bandgap analysis) of CNS.

107

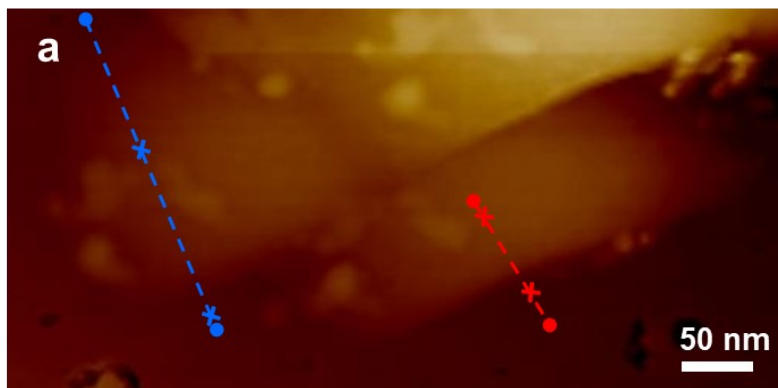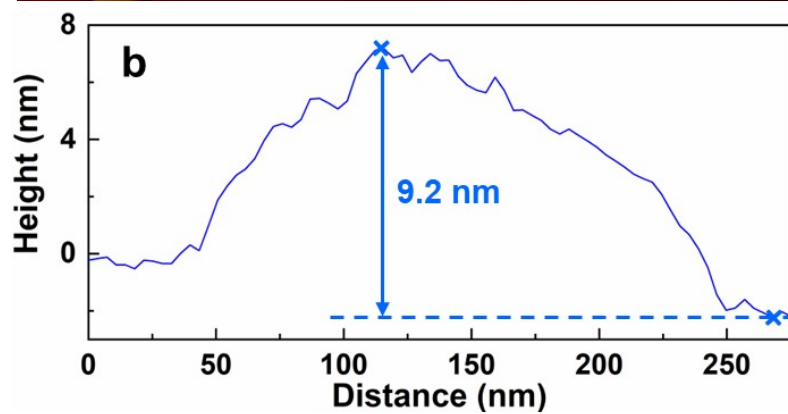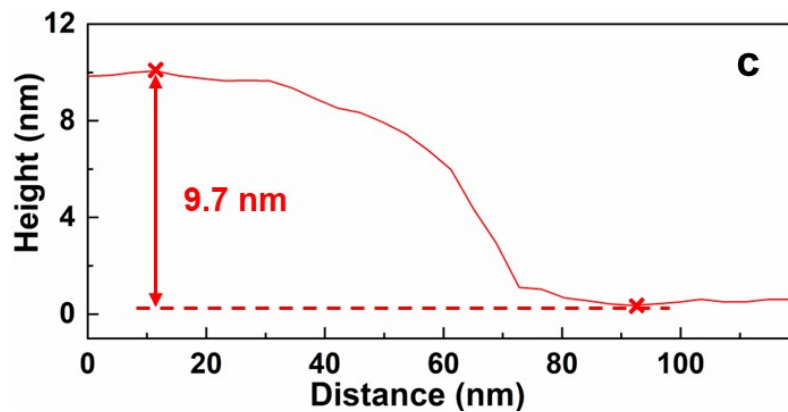

108

109 **Fig. S3** (a) AFM images and (b, c) height curves of CNS.

110

111

112

113

114

115



116 **Section S3. SMF study of site-specific catalytic activities, dynamics.**

117 The non-fluorescent AR was used as probe molecules to detect  $h^+$  and study the catalytic  
118 heterogeneities on wrinkles, edges and BPs of CNS (**Fig. S4**). The kinetic steps including reactant  
119 absorption, conversion, product dissociation and temporal activity fluctuations are quantified on  
120 such structures. Upon laser excitation (405 nm), AR can be photo-oxidized via an indirect way by  
121  $\bullet OH$  radicals produced from the reaction of  $h^+$  and  $OH^-$  in water.<sup>20</sup> The product molecule, resorufin  
122 is photoexcited by the 532 nm laser and the emitted fluorescence signal is collected by the EMCCD  
123 camera with high sensitivity. Hence, in **Fig. S5a**, the bright dots (in yellow circles) represent the  
124 formation of fluorescent resorufin molecules on CNS.

125

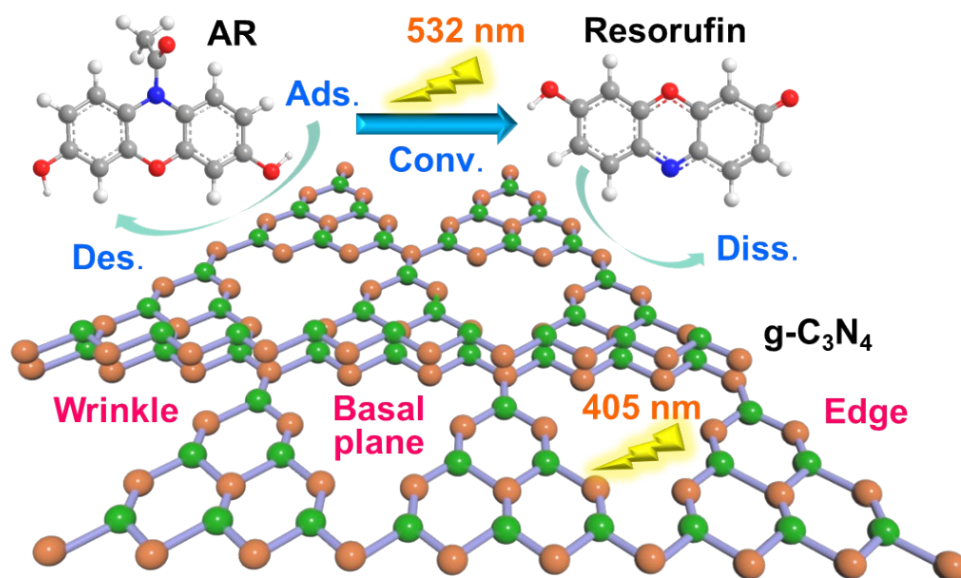

126

127 **Fig. S4** Schematic of the photocatalytic process under the TIRF microscope.

128

129

130

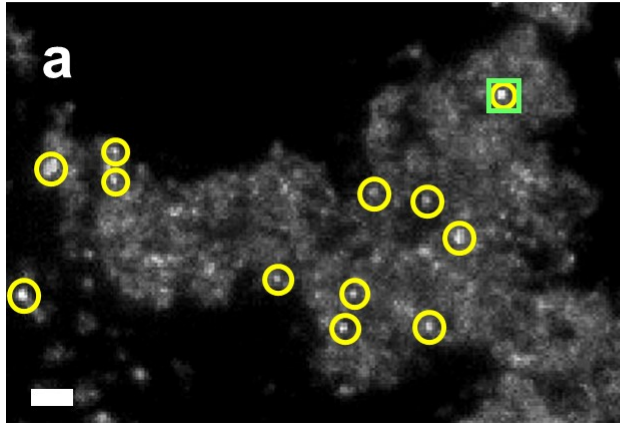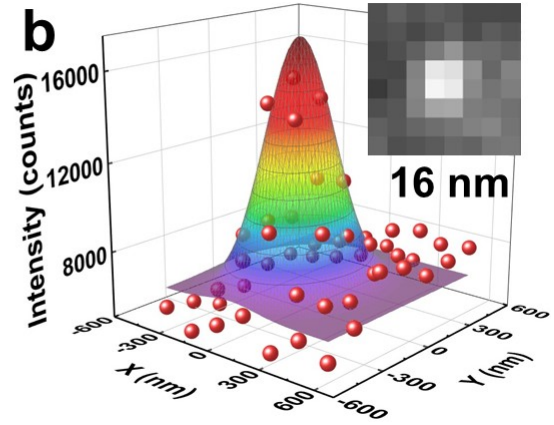

131

132 **Fig. S5** (a) A single frame of fluorescent bursts (in yellow circles) on CNS. (b) The calculation of  
133 spatial resolution using 2D Gaussian fitting (inset: the area from the green square in (a)).

134

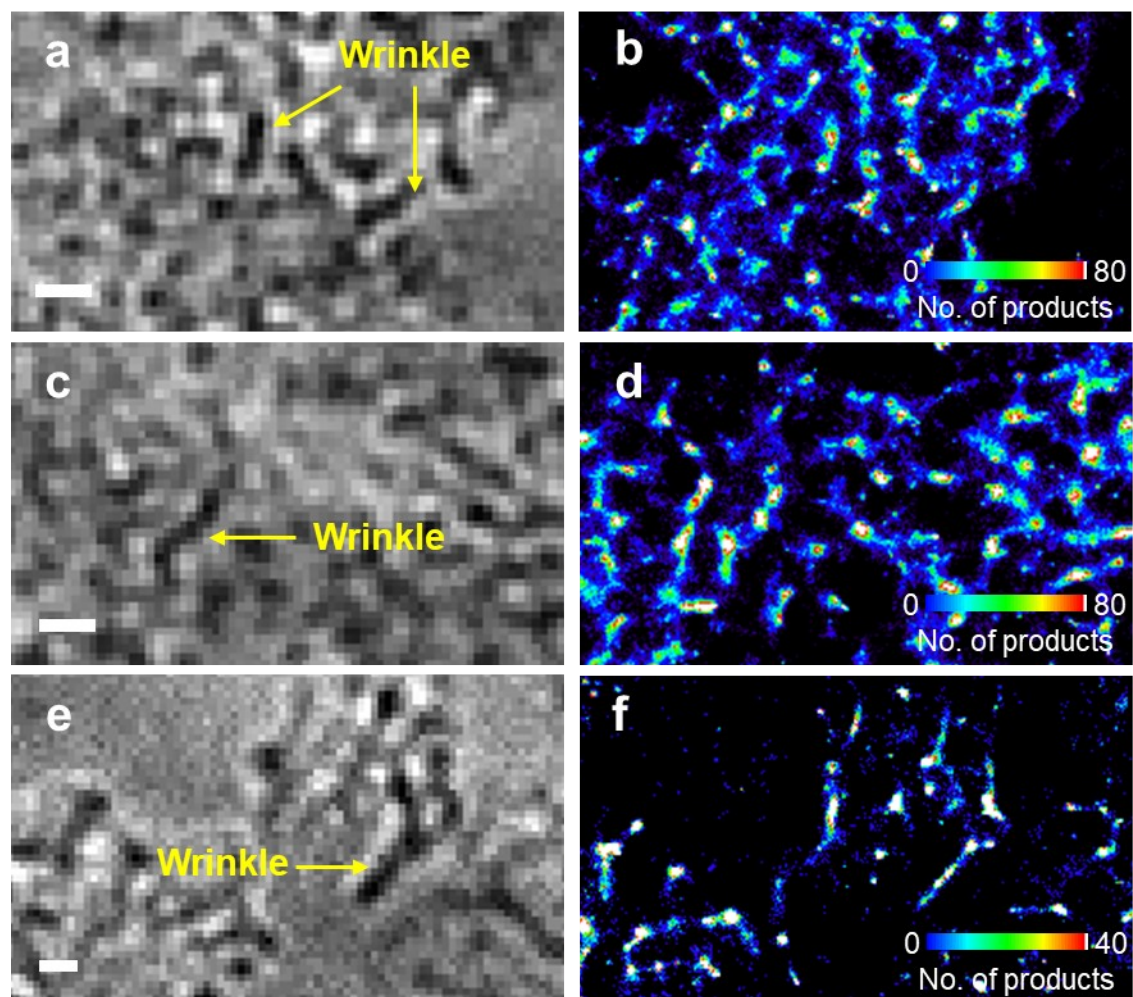

135

136 **Fig. S6** (a, c, e) The bright-field images and (b, d, f) corresponding density maps (bin size: 30 nm  
 137 × 30 nm) of CNS with AR. Scale bar: 1 μm.

138

139

140 **Section S4. Determine the localization precision of SMF imaging.**

141 Based on the previous works,<sup>21, 22</sup> the localization precision can be determined by fitting the  
142 fluorescence intensity with 2D elliptical Gaussian functions (**Eqn. S2, Fig. S5b**):

143 
$$I(x,y) = A + B * \exp\left(-\left(\frac{(x-x_0)^2}{2S_x^2} + \frac{(y-y_0)^2}{2S_y^2}\right)\right)$$
 (S2)

144 where  $(x_0, y_0)$  is the center position, A is the background level, B is the peak intensity at  $(x_0, y_0)$ ,  
145  $S_x$  and  $S_y$  are the standard deviations of the Gaussian distribution along the x- and y-axes,  
146 respectively. The localization precision ( $\sigma_{j, j=x, y}$ ) can be calculated using **Eqn. S3**:

147 
$$\sigma_j = \sqrt{\left(\frac{S_j^2}{N} + \frac{a^2}{12} + \frac{8\pi S_j^4 b^2}{a^2 N^2}\right)}$$
 (S3)

148 where  $N$  is the photons collected,  $a$  is the pixel size, and  $b$  is the background noise in photons.  
149 For the fluorescent burst in the inset of **Fig. S5b**, the parameters are calculated to be  $S_x = 143$  nm,  
150  $S_y = 164$  nm,  $a = 160$  nm,  $N = 660$ ,  $b = 13$ ,  $\sigma_x = 14$  nm and  $\sigma_y = 18$  nm. Thus, the average localization  
151 precision is calculated to be  $\sigma_{xy} = 16$  nm using **Eqn. S4**:

152 
$$\sigma_{xy} = (\sigma_x + \sigma_y)/2$$
 (S4)

153

154 **Section S5. Image segmentation.**

155 To determine the size of reaction subregions, image segmentation was carried out. As shown in  
156 **Fig. S7b,c**, the cross-profiles on the wrinkle and edge are obtained from the marked rectangles in  
157 **Fig. S7a**. The intensity-position profiles are fitted with Gaussian function to obtain the FWHM.  
158 The averaged FWHM for the wrinkle and edge profiles are determined to be 164 and 154 nm,  
159 respectively (**Table S1**). Such values are close to the size of one pixel (160 nm). Thus, the sizes of  
160 the subregions for wrinkles and edges are 1×1 pixel (160 nm × 160 nm). Besides, we make sure  
161 that each subregion contains one fluorescent burst. Otherwise, the size along the wrinkle or edge  
162 is reduced (e.g., 100 nm × 160 nm) to meet this criterion. Regarding the BPs, we also use the  
163 subregion size of 160 nm × 160 nm for convenience with one fluorescent burst in a subregion.

164

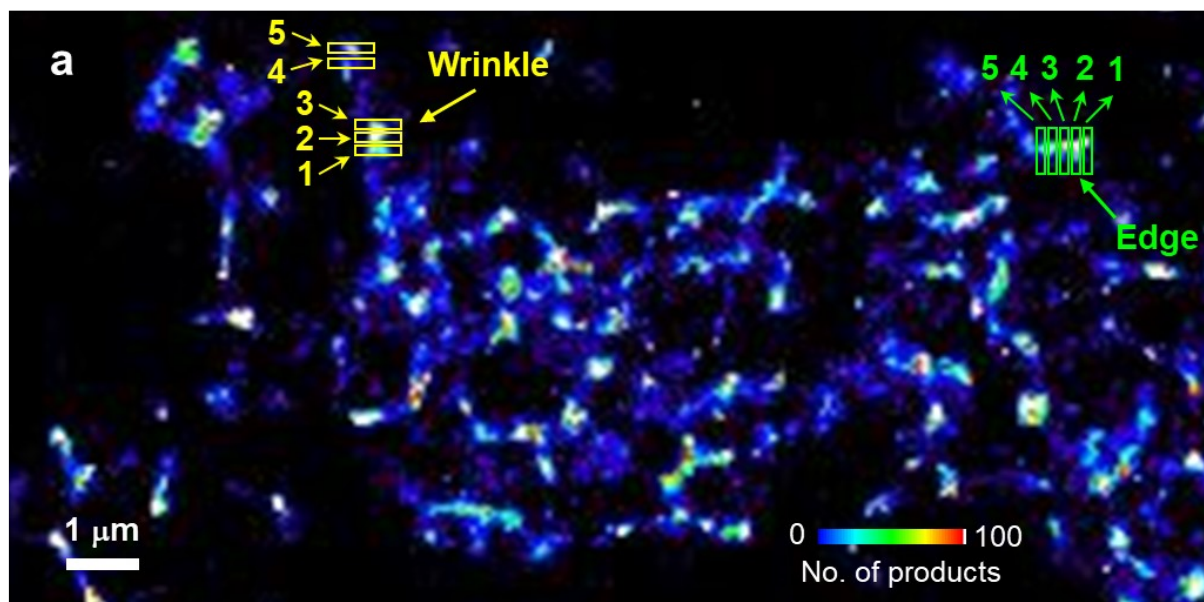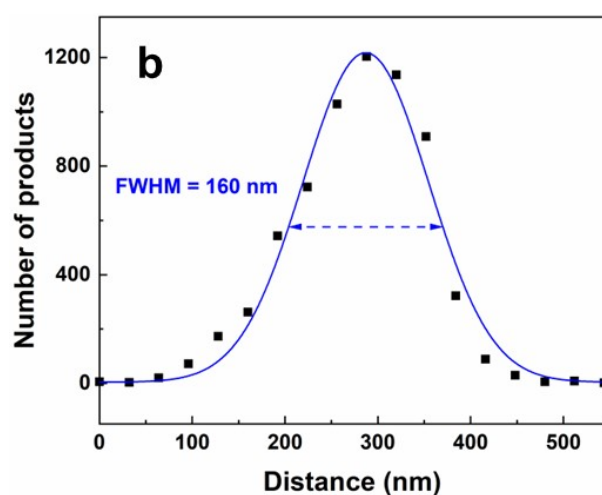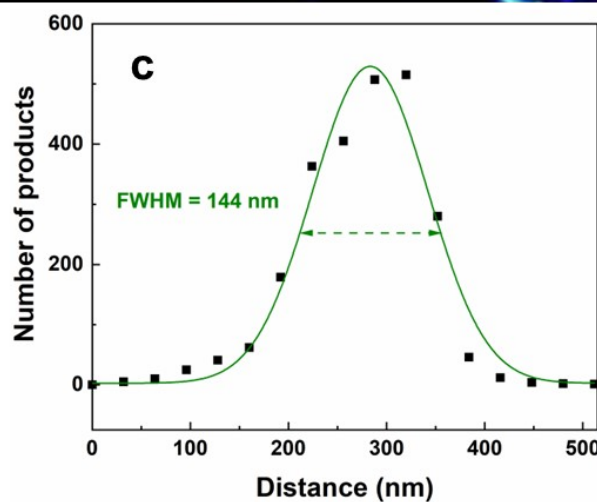

165

166 **Fig. S7** (a) Image segmentation of wrinkles and edges in the density map. Cross-profiles of number

167 of products fitted by Gaussian function at the (b) wrinkle (position 2) and (c) edge (position 3)

168 marked in (a).

169

170

171

172

173

174 **Table S1.** The FWHM of cross-profiles of number of products at wrinkle and edge positions.

| Positions         | 1   | 2   | 3   | 4   | 5   | Average |
|-------------------|-----|-----|-----|-----|-----|---------|
| Wrinkle FWHM (nm) | 198 | 160 | 178 | 137 | 145 | 164     |
| Edge FWHM (nm)    | 130 | 186 | 144 | 158 | 151 | 154     |

175

176

177

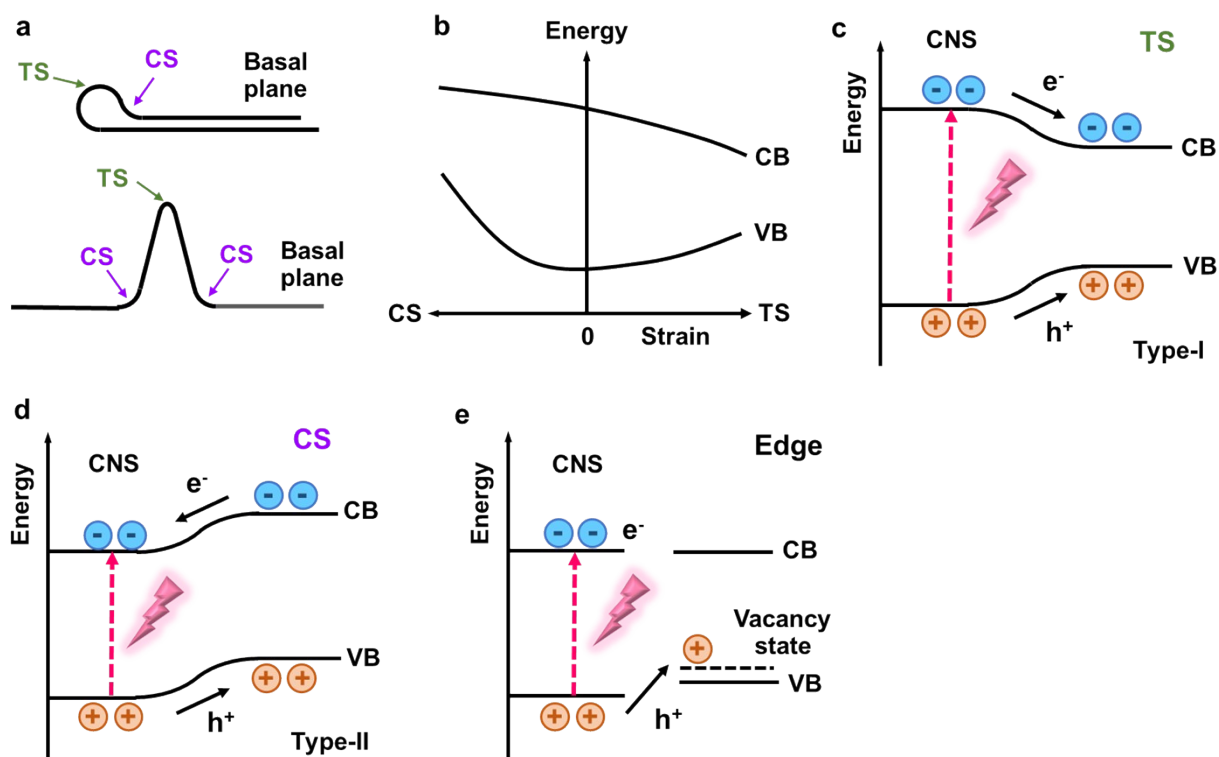

178

179 **Fig. S8** (a) Schematic of wrinkle formation and strain distributions in wrinkles. (b) The

180 dependence of CB and VB positions on the CS and TS present in the structure. Schematic of band

181 modulation with presence of (c) TS in wrinkles, (d) CS in wrinkles and (e) vacancies in edges.

182



183 **Section S6. SMF study of temporal activity fluctuations.**

184 To study the temporal variation of reaction rates, the number of single turnovers per unit time  
 185 (turnover rates) was analyzed based on the trajectories (**Fig. S9a**). The activity fluctuation is related  
 186 to the perturbation in chemical reaction ( $\tau_{\text{off}}$ ), product dissociation ( $\tau_{\text{on}}$ ) or both, known as catalysis-  
 187 induced activity fluctuations.<sup>23</sup> The autocorrelation functions,  $C_{\tau}(m) = \langle \Delta\tau(0)\Delta\tau(m) \rangle / \langle \Delta\tau(0)^2 \rangle$ , can be  
 188 used to analyze the effect of  $\tau_{\text{off}}$  and  $\tau_{\text{on}}$  on fluctuations, where  $\Delta\tau(m) = \tau(m) - \langle \tau \rangle$ ,  $\tau$  represent  $\tau_{\text{off}}$  or  
 189  $\tau_{\text{on}}$  and  $m$  is the index number.<sup>24,25</sup> As shown in **Fig. S9b,c**,  $C_{\tau_{\text{off}}}$  and  $C_{\tau_{\text{on}}}$  show an exponential decay  
 190 with  $m$ , suggesting the fluctuations exist in both  $\tau_{\text{off}}$  and  $\tau_{\text{on}}$  reactions. The corresponding  
 191 correlation time is calculated by multiplying the fitted decay constant (from **Fig. S9b,c**) by the  
 192 average turnover time (from **Fig. S9a**). Thus, the correlation times for  $\tau_{\text{off}}$  and  $\tau_{\text{on}}$  reactions in **Fig.**  
 193 **S9b,c** are calculated to be 6.6 and 1.9 s, respectively. The histogram distributions of correlation  
 194 times (from > 30 locations) are shown in the insets of **Fig. S9b,c**.

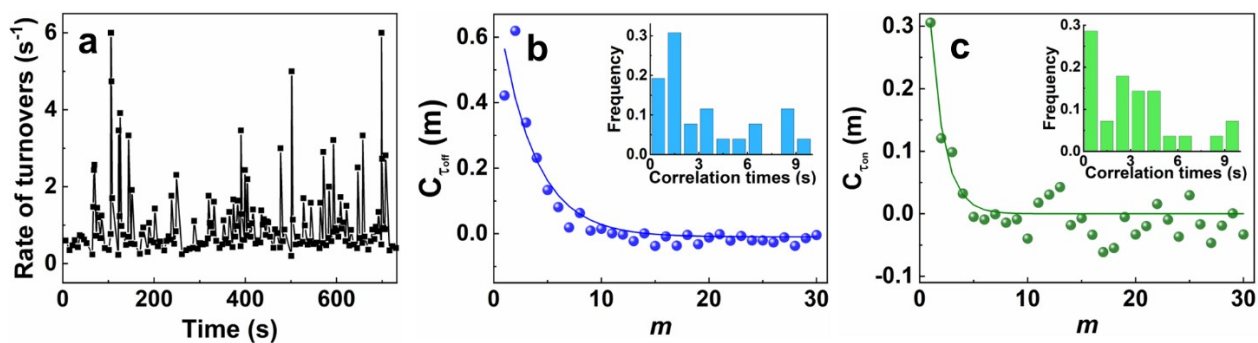

196 **Fig. S9** (a) A single-turnover trajectory from the BP calculated based on every 10 turnovers.  
 197 Autocorrelation functions of (b)  $\tau_{\text{off}}$  and (c)  $\tau_{\text{on}}$  reactions obtained from (a). Insets: Histogram  
 198 distribution of correlation times calculated from > 30 subregions.

199

200



201

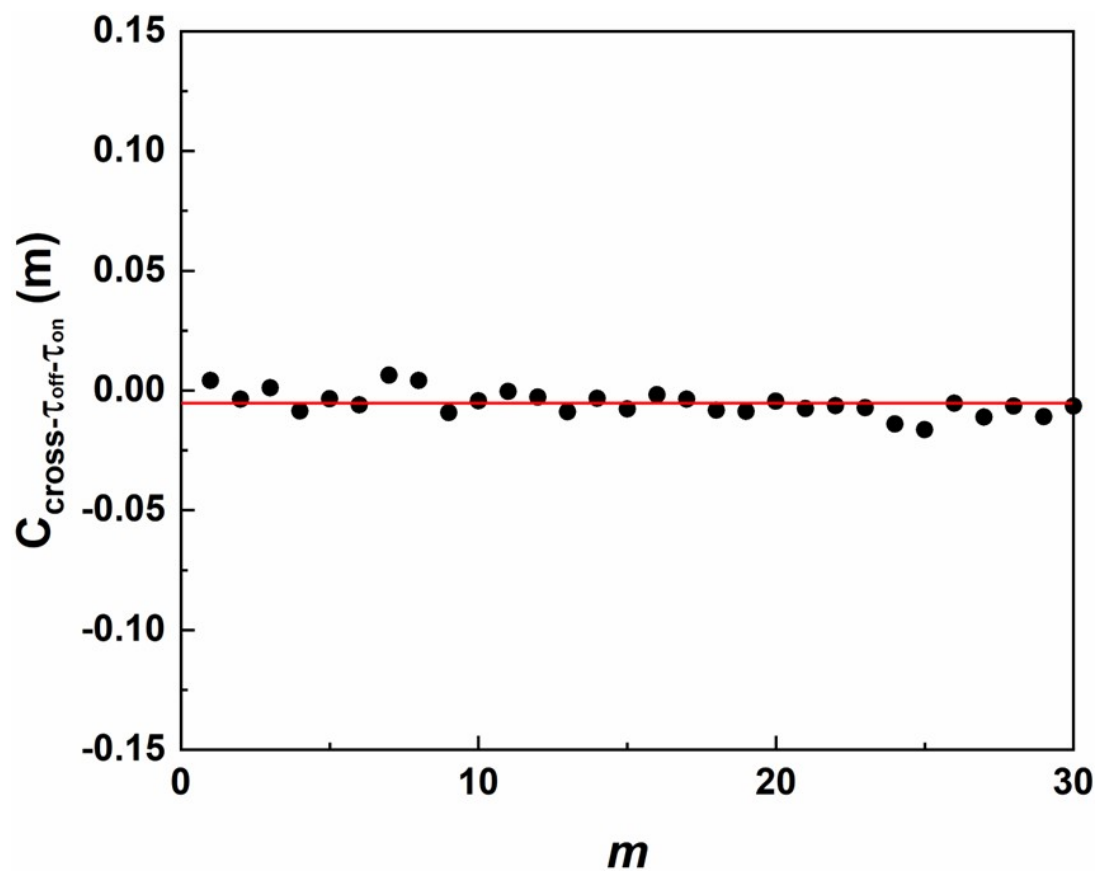

202

203 **Fig. S10** Cross correlation function of  $\tau_{off}$  and  $\tau_{on}$  from the trajectory in **Fig. S9a**.

204

205 **Section S7. AR adsorption on BP, wrinkle, and edge surfaces by DFT simulation.**

206 In the figures below, the initial and corresponding optimized geometries of AR on different  
207 surfaces of g-C<sub>3</sub>N<sub>4</sub> are presented in **Fig. S11-S13**. The initial positions of adsorbed species on the  
208 surfaces affect the final adsorption geometries as well as the energies, thus we started with nine  
209 initial positions to try to cover the most plausible interactions of adsorbate molecule on the  
210 surfaces.

211 We also performed Bader charge analyses to study the change in charge density and quantify  
212 the amount of charge transfer between different CNS structures and AR. We found Bader charges  
213 of 0.006, 0.036, and 0.013 e to be transferred from AR onto BP, edge, and wrinkle surfaces,  
214 respectively. Despite the relatively weaker adsorption energies, there is definite charge transfer  
215 from AR to the wrinkle and edge CNS surfaces. As a result, an inbuilt electric field directed from  
216 AR to edge and wrinkle is generated at the interface, which enables better separation of  
217 photoelectron-hole pairs and enhances photocatalytic activity.<sup>26</sup> More electron transfer observed  
218 on the edge and wrinkle indicate better charge separation and faster oxidation of AR on these  
219 structures. These electron transfer values are quantitatively low since they are calculated in the  
220 ground state; thus, we recommend further material simulations that could unravel the photoactivity  
221 of CNS surfaces upon light activation.

222

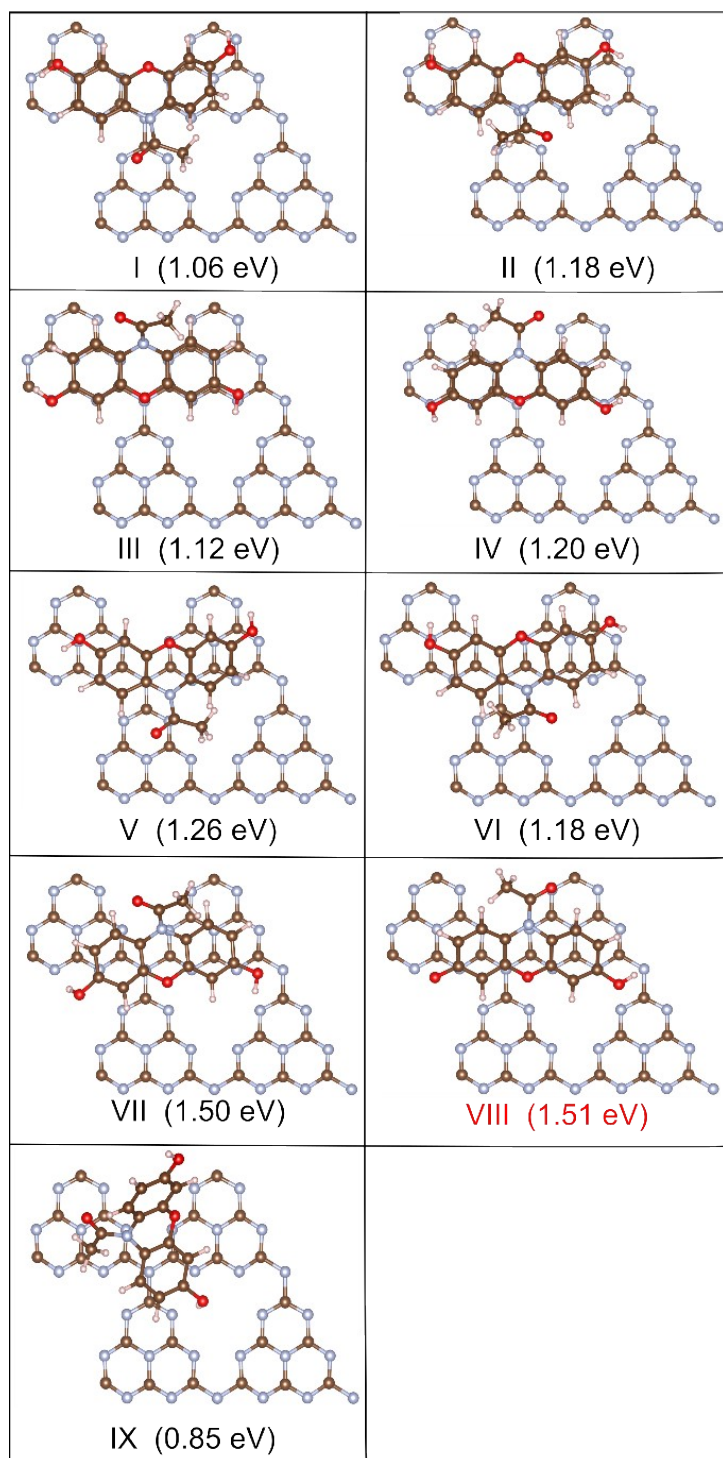

223

224 **Fig. S11** Optimized geometries of AR on BP surface. Structures I-VIII are flat-on configurations  
 225 while structure IX is a T-shaped configuration. The most stable structure (VIII) was taken as the  
 226 final adsorption geometry of AR on BP surface as reported in the manuscript.

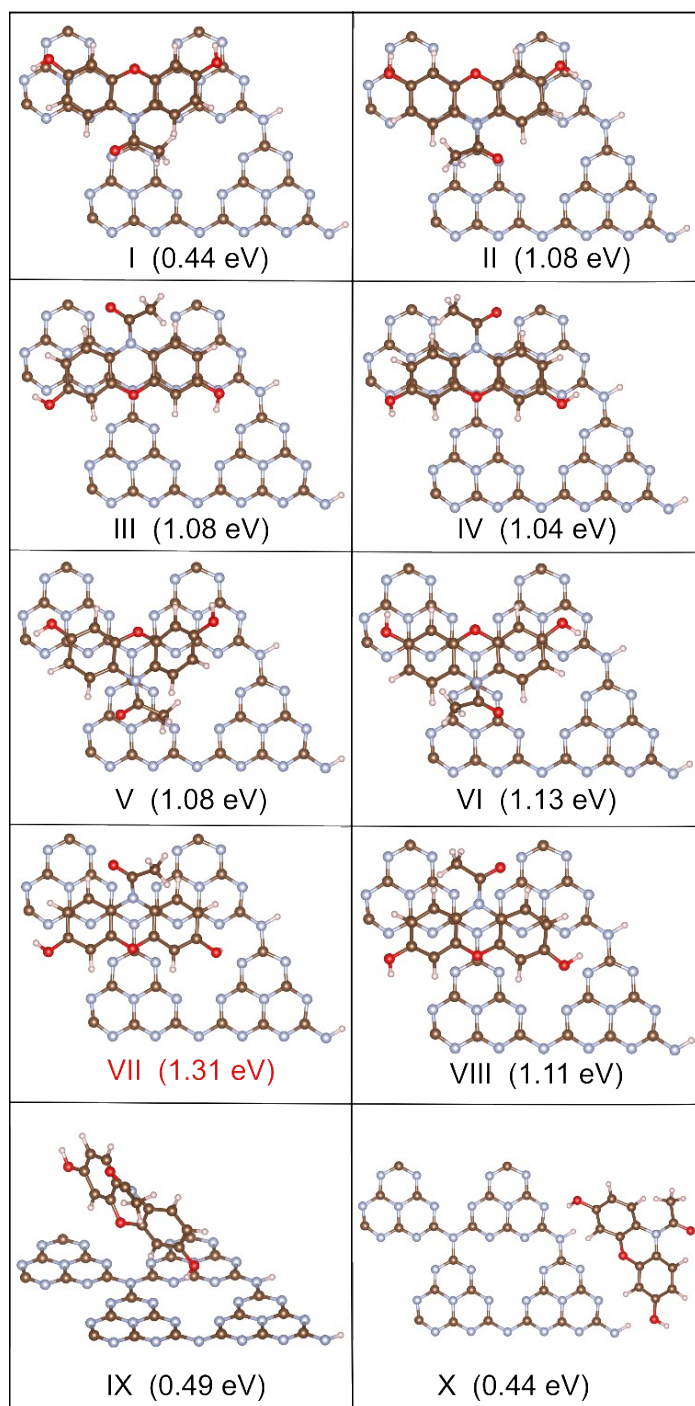

227

228 **Fig. S12** Optimized geometries of AR on edge surfaces. Structures I-VIII are flat-on configurations  
 229 while structure IX is an edge-on configuration and X as side configuration. The most stable  
 230 structure (VII) was taken as the final adsorption geometry of AR on edge surface as reported in  
 231 the manuscript.

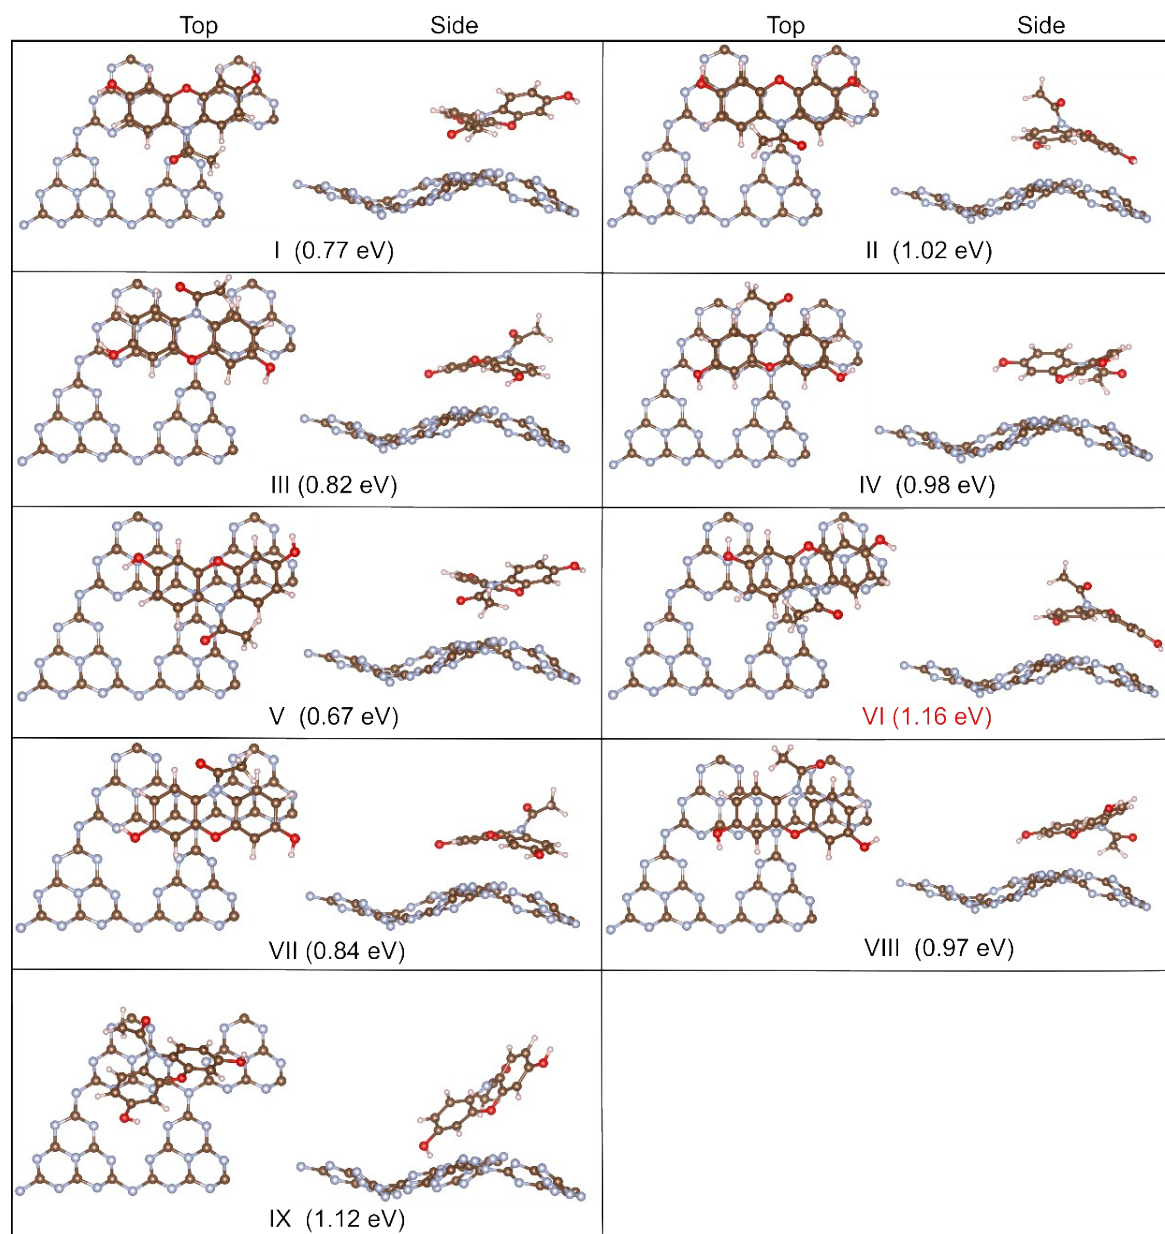

232

233 **Fig. S13** Optimized geometries of AR on wrinkle surface with top (left) and side (right) views.

234 Structures I-VIII are flat-on configurations while structure IX is an edge-on configuration. The

235 most stable structure (VI) was taken as the final adsorption geometry of AR on wrinkle surface as

236 reported in the manuscript.

237

238

## 239 Reference

- 240 1. Y. Li, R. Jin, Y. Xing, J. Li, S. Song, X. Liu, M. Li and R. Jin, *Adv. Energy Mater.*, 2016, **6**, 1601273.  
241 2. G. Kresse and J. Hafner, *Phys. Rev. B*, 1993, **47**, 558.  
242 3. G. Kresse and J. Hafner, *Phys. Rev. B*, 1994, **49**, 14251.  
243 4. G. Kresse and J. Furthmüller, *Comput. Mater. Sci.*, 1996, **6**, 15-50.  
244 5. G. Kresse and J. Furthmüller, *Phys. Rev. B*, 1996, **54**, 11169.  
245 6. J. P. Perdew, K. Burke and M. Ernzerhof, *Phys. Rev. Lett.*, 1996, **77**, 3865.  
246 7. J. P. Perdew, K. Burke and M. Ernzerhof, *Phys. Rev. Lett.*, 1997, **78**, 1396.  
247 8. P. E. Blöchl, *Phys. Rev. B*, 1994, **50**, 17953.  
248 9. G. Kresse and D. Joubert, *Phys. Rev. B*, 1999, **59**, 1758.  
249 10. S. Grimme, J. Antony, S. Ehrlich and H. Krieg, *J. Chem. Phys.*, 2010, **132**, 154104.  
250 11. S. Grimme, S. Ehrlich and L. Goerigk, *J. Comput. Chem.*, 2011, **32**, 1456-1465.  
251 12. G. Henkelman, A. Arnaldsson and H. Jónsson, *Comput. Mater. Sci.*, 2006, **36**, 354-360.  
252 13. E. Sanville, S. D. Kenny, R. Smith and G. Henkelman, *J. Comput. Chem.*, 2007, **28**, 899-908.  
253 14. W. Tang, E. Sanville and G. Henkelman, *J. Phys. Condens. Matter.*, 2009, **21**, 084204.  
254 15. G. Li, B. Wang, J. Zhang, R. Wang and H. Liu, *Appl. Surf. Sci.*, 2019, **478**, 1056-1064.  
255 16. J. Zhang, J. Chen, Y. Wan, H. Liu, W. Chen, G. Wang and R. Wang, *ACS Appl. Mater. Interfaces*, 2020,  
256 **12**, 13805-13812.  
257 17. C. Wu, S. Xue, Z. Qin, M. Nazari, G. Yang, S. Yue, T. Tong, H. Ghasemi, F. C. R. Hernandez and S. Xue,  
258 *Appl. Catal. B: Environ.*, 2021, **282**, 119557.  
259 18. P. Niu, L. Zhang, G. Liu and H. M. Cheng, *Adv. Funct. Mater.*, 2012, **22**, 4763-4770.  
260 19. Z. Tong, D. Yang, Y. Sun, Y. Nan and Z. Jiang, *Small*, 2016, **12**, 4093-4101.  
261 20. J. B. Sambur and P. Chen, *J. Phys. Chem. C*, 2016, **120**, 20668-20676.  
262 21. T.-X. Huang, B. Dong, S. L. Filbrun, A. A. Okmi, X. Cheng, M. Yang, N. Mansour, S. Lei and N. Fang,  
263 *Sci. Adv.*, 2021, **7**, eabj4452.  
264 22. B. Dong, Y. Pei, F. Zhao, T. W. Goh, Z. Qi, C. Xiao, K. Chen, W. Huang and N. Fang, *Nat. Catal.*, 2018,  
265 **1**, 135-140.  
266 23. X. Zhou, W. Xu, G. Liu, D. Panda and P. Chen, *J. Am. Chem. Soc.*, 2010, **132**, 138-146.  
267 24. H. P. Lu, L. Xun and X. S. Xie, *Science*, 1998, **282**, 1877-1882.  
268 25. W. Xu, J. S. Kong and P. Chen, *Phys. Chem. Chem. Phys.*, 2009, **11**, 2767-2778.  
269 26. F. Yu, Z. Wang, S. Zhang, H. Ye, K. Kong, X. Gong, J. Hua and H. Tian, *Adv. Funct. Mater.*, 2018, **28**,  
270 1804512.

271
